# Supplementary material
Source: PubMed Central journal article supplement (PMC5846902)
Supplement: jciinsight-2-92052-s001.pdf [file jciinsight-2-92052-s001.pdf]

## Supplemental Figures and Tables

### Deficiency of *Shank2* Causes Mania-like Behavior That Responds to Mood Stabilizers

Andrea L. Pappas<sup>1</sup>, Alexandra L. Bey<sup>1</sup>, Xiaoming Wang<sup>2</sup>, Mark Rossi<sup>1</sup>, Yong Ho Kim<sup>5</sup>, Hai Dun Yan<sup>2</sup>, Lara J. Duffney<sup>2</sup>, Samantha M. Phillips<sup>2</sup>, Fiona Porkka<sup>3</sup>, Xinyu Cao<sup>1</sup>, Jin-dong Ding<sup>9</sup>, Ramona M. Rodriguiz<sup>3</sup>, Henry Yin<sup>1,4</sup>, Richard J. Weinberg<sup>9</sup>, Ru-Rong Ji<sup>1,5</sup>, William C. Wetsel<sup>1,3,6,7</sup>, Yong-hui Jiang<sup>1,2,6,7,8\*</sup>.

Departments of <sup>1</sup>Neurobiology, <sup>2</sup>Pediatrics, <sup>3</sup>Psychiatry and Behavioral Sciences, <sup>4</sup>Psychology and Neuroscience, <sup>5</sup>Anesthesiology, <sup>6</sup>Cell Biology, <sup>7</sup>Duke Institute of Brain Science, <sup>8</sup>Genomics and Genetics Graduate Program, Duke University, Durham NC 27710, USA; <sup>9</sup>Department of Cell Biology and Physiology, the University of North Carolina at Chapel Hill, NC 27599, USA

\*Correspondence:

Yong-hui Jiang, MD, PhD.

Departments of Pediatrics and Neurobiology

Duke University School of Medicine

Email:yong-hui.jiang@duke.edu

**Office:** GSRB1 4004

905 S. LaSalle ST, Durham. NC 27710

Phone:919-681-2789

Fax:919-684-8944

# Supplemental Figure 1.

**A**

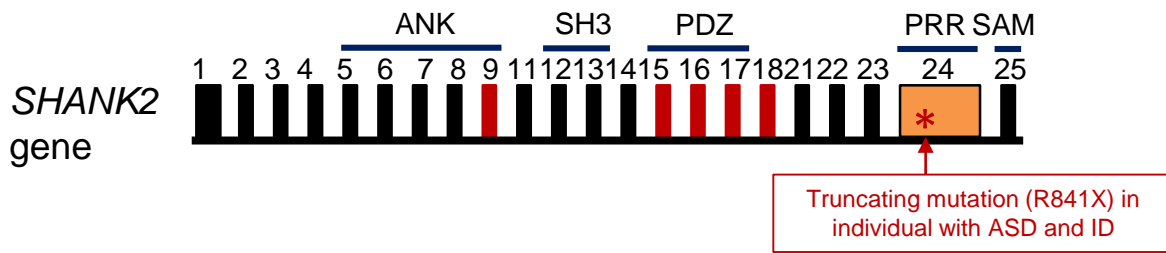

**B**

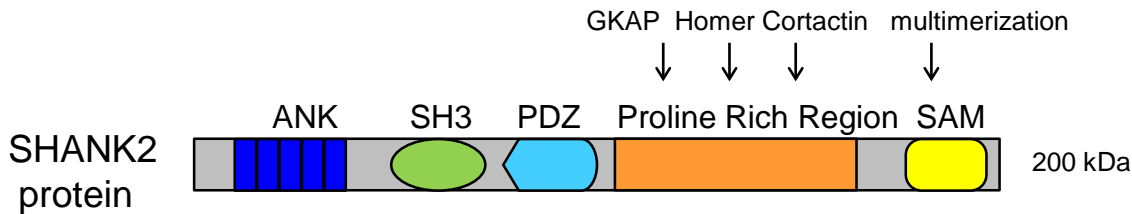

**C**

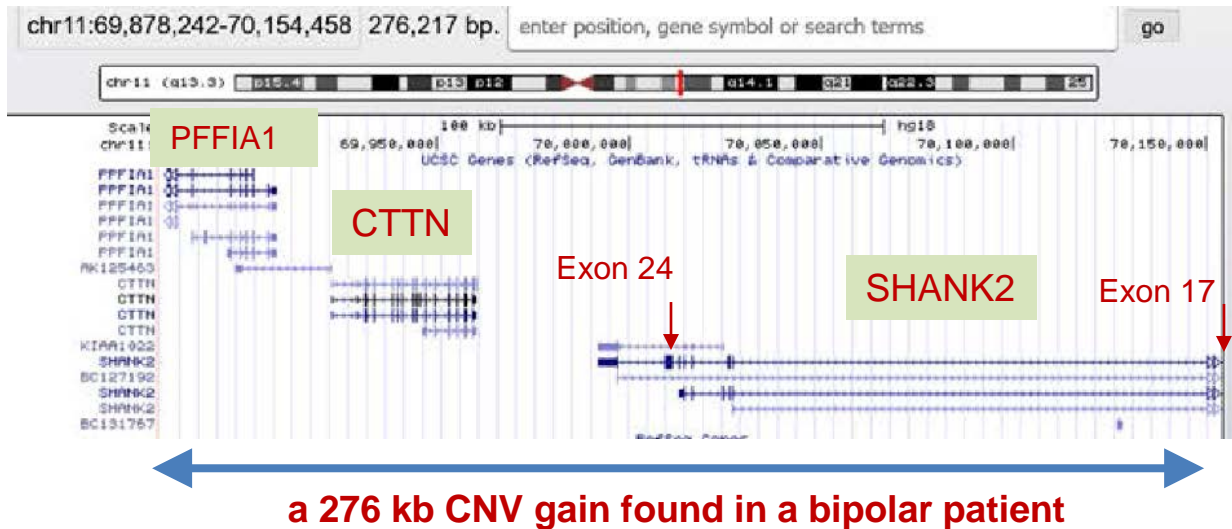

**D**

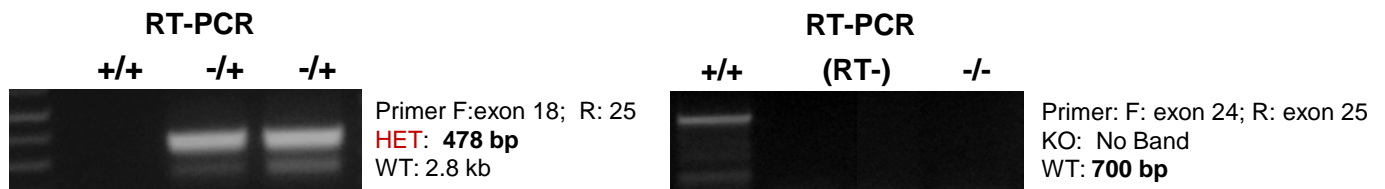

## Supplemental Figure 1. *SHANK2* gene, protein, *SHANK2* genetic defects in human, and RNA analysis of Shank2 in $\Delta e24$ mutant mice.

**A-B.** Diagram of the structure of the human *SHANK2* gene and protein. (A) The nonsense mutation R841X is found in an individual with ASD and ID. (B) *SHANK2* protein contains 5 conserved domains that include Ankrin repeats (ANK), Src homology 3 domain (SH3), *Drosophila* disk large tumor suppressor (DlgA), and Zonula occludens-1 protein domain (Zo-1) (PDZ), proline-rich region (PRR), and the sterile  $\alpha$ -motif domain (SAM). The predicted protein structures and potential binding partners are shown. **C.** A 276 kb duplication (hg18: 6878242-70154458) is reported in an individual with bipolar disorder (Noor et al). The proximal breakpoint is within intron 17 of the *PFFIA1* gene and the distal breakpoint is within the intron 16 of the *SHANK2* gene. *In silico* analysis predicts the disruption of exons 17-25 of *SHANK2* in this patient. **D.** RT-PCR analysis showed that deletion of exon 24 in mice produced a mRNA product with e24 missing (left panel) when primers were anchoring exon 18 and exon 25. There is no WT product in  $\Delta e24^{-/-}$  brain tissue (right panel) when the primer is located in exon 24 and exon 25. The WT has a 2.8 kb, HET has a 478 kb, and KO has no Shank2 product.

# Supplemental Figure 2

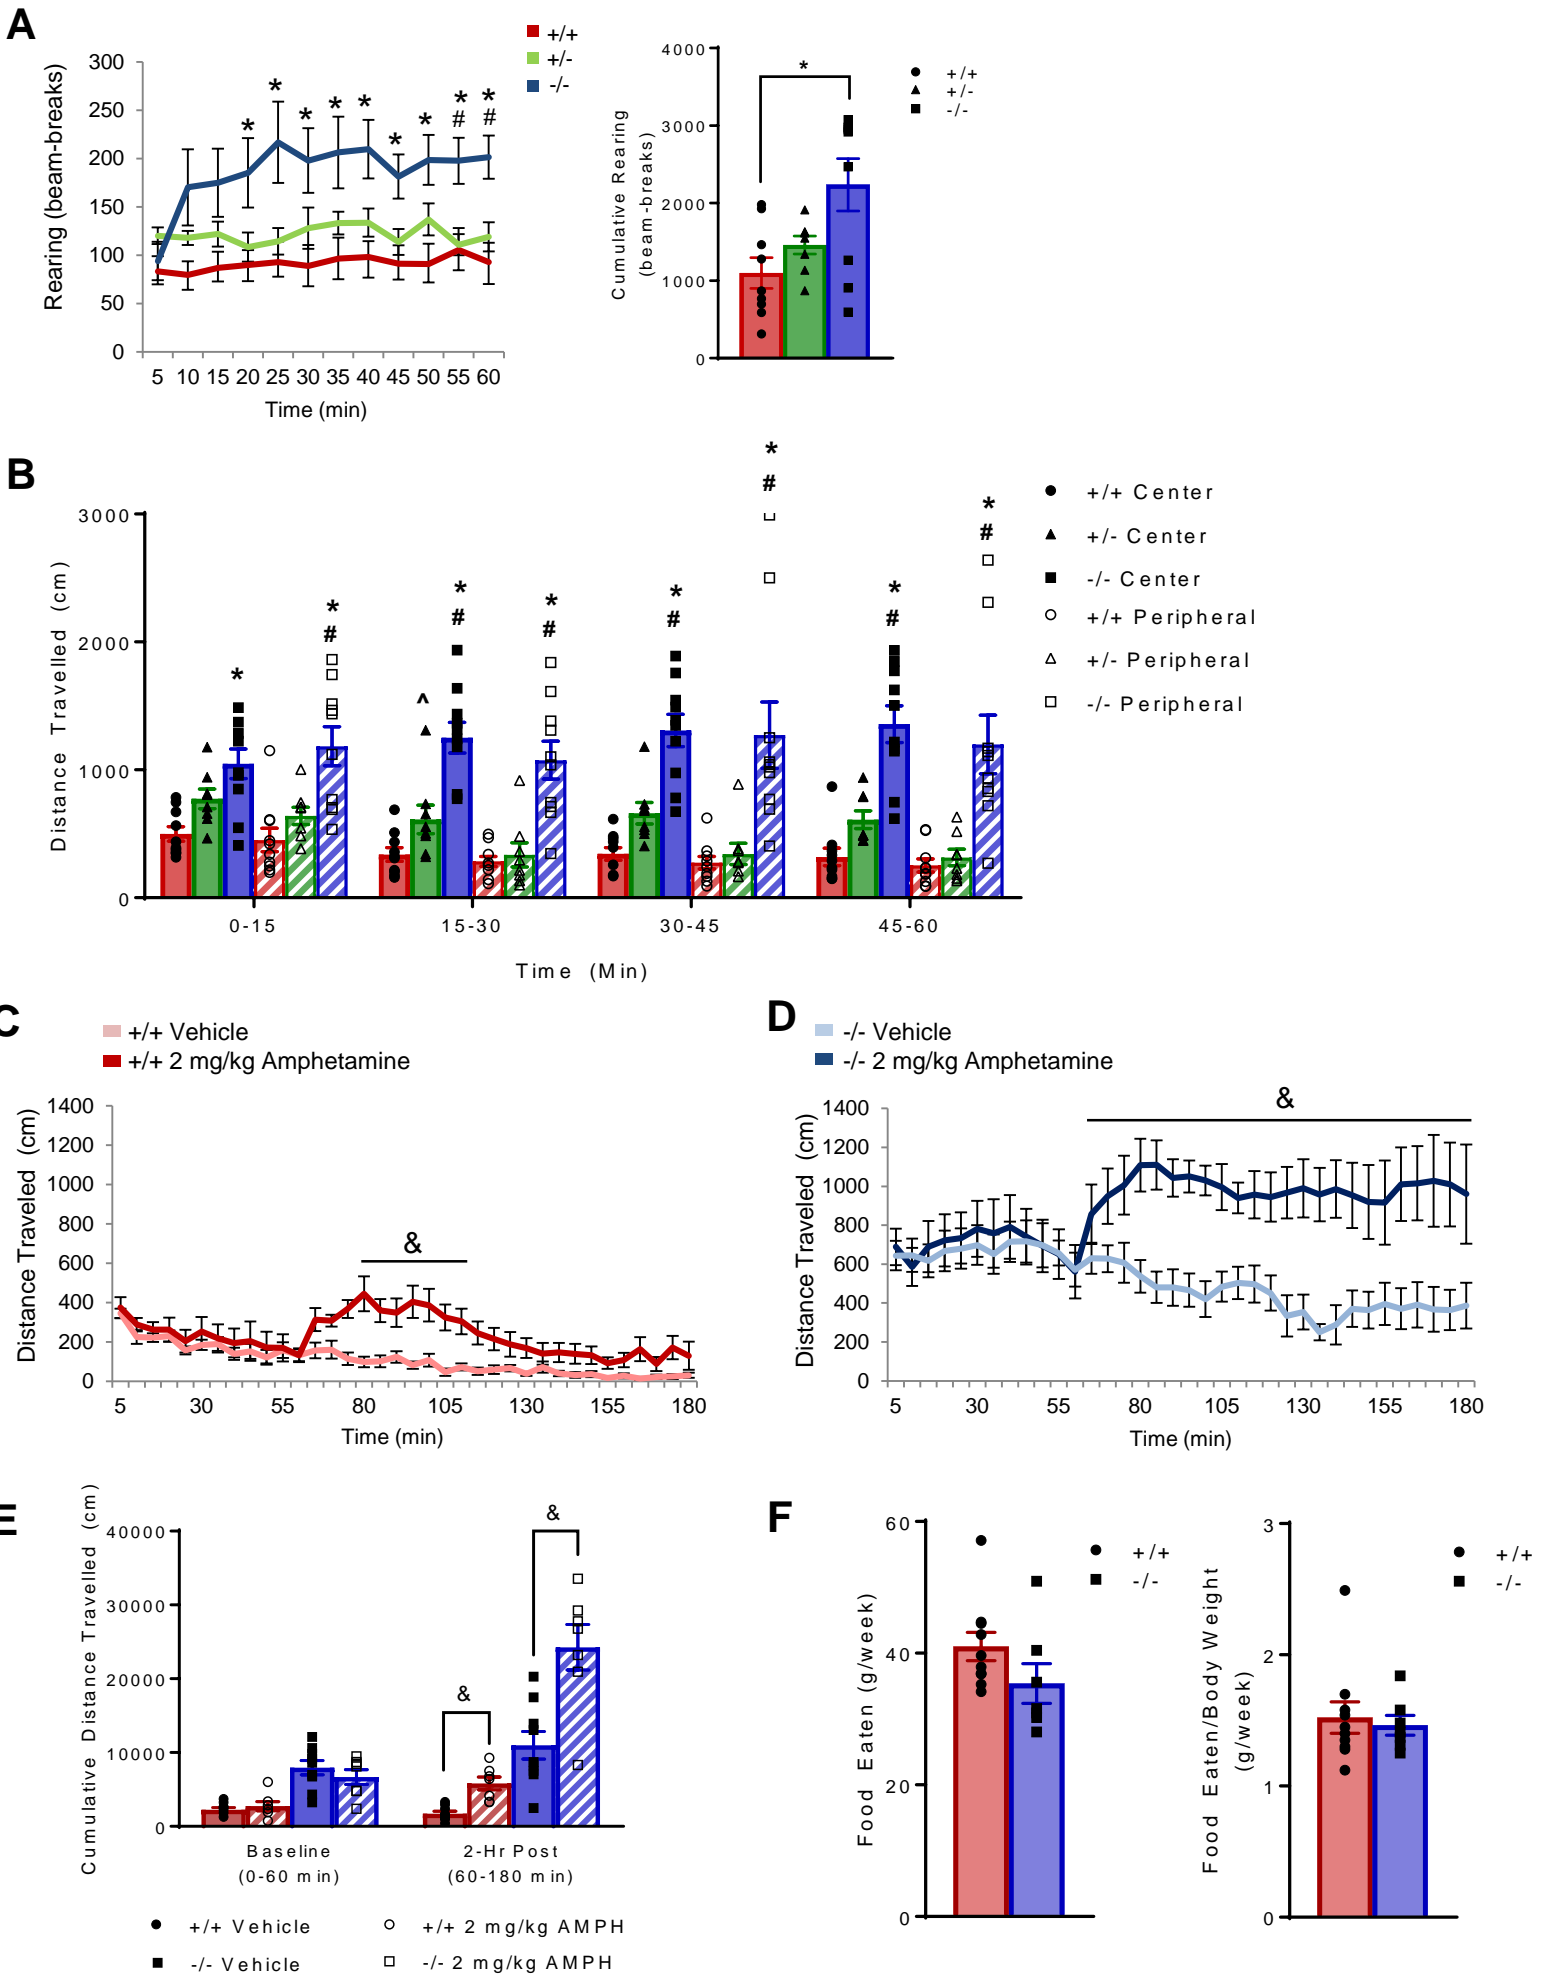

**Supplemental Figure 2. Shank2  $\Delta e24$  mice display increased rearing and enhanced locomotor activity in response to amphetamine.**

- A. Rearing (vertical) activity was significantly increased in  $\Delta e24^{-/-}$  mice. **B.** The distance traveled in the center and peripheral zones per 15 minute bin during the 60 minute open field was comparable between  $\Delta e24^{-/-}$  and  $e24^{+/+}$  mice (N=8-10 mice/genotype; \* $p < 0.05$ ,  $+/+$  vs  $-/-$ ; # $p < 0.05$ ,  $+/-$  vs  $-/-$ , + $p < 0.05$ ,  $+/+$  vs  $+/-$ , ^ $p < 0.05$ ,  $+/-$  Center vs  $+/-$  peripheral). **C-E.** Enhanced locomotor activity in response to amphetamine. As expected  $e24^{+/+}$  mice responded to amphetamine (AMPH) treatment with increased locomotor activity. The  $\Delta e24^{-/-}$  mice had a significantly enhanced response to AMPH. (N=7-9 mice/genotype; & $p < 0.05$ , for AMPH treated vs Vehicle). **F.** Food intake in  $\Delta e24^{-/-}$  mice is similar to  $e24^{+/+}$  mice. (Mean  $\pm$  SEM)

## Supplementary Figure 3

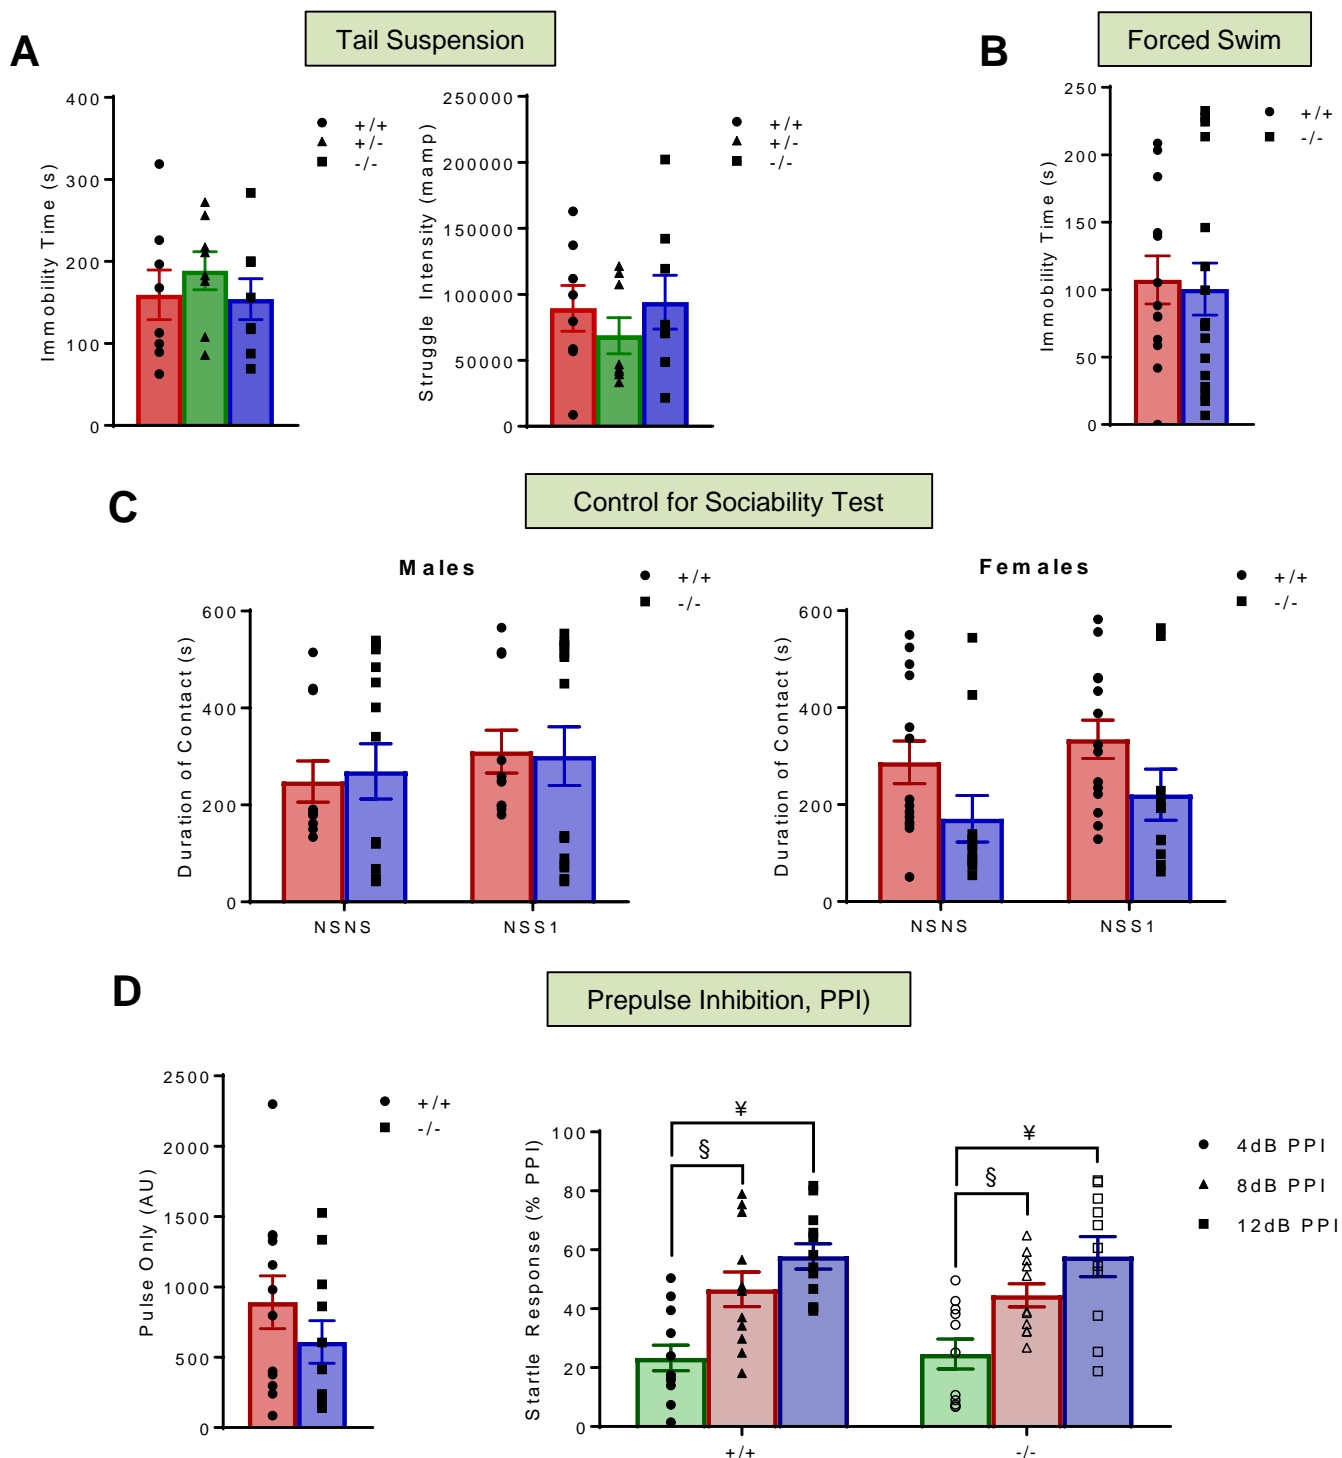

**Supplemental Figure 3. Depressive-like behaviors, social interaction, and PPI were normal in Shank2  $\Delta e24$  mice.** **A.** In the tail suspension test the  $\Delta e24^{-/-}$  mice spent similar amounts of time immobile (*left*) and engaged in similar levels of struggle activity (*right*) as the other genotypes (N=8 mice/genotype). **B.** In the forced swim test the  $\Delta e24^{-/-}$  mice spent similar times immobile as  $e24^{+/+}$  controls (N=13-17 mice/genotype). **C.** Male and female  $\Delta e24^{-/-}$  mice spent similar amounts of total time interacting with the social and non-social stimuli in two phases of the sociability test (N=11-14 mice/genotype/sex). **D.**  $\Delta e24^{-/-}$  mice showed normal startle activity to the 120 dB acoustic stimulus (*right*) and normal PPI (*left*) (N=11-12 mice/genotype). (§  $p < 0.05$ , 4 vs 8 db; ¥  $p < 0.05$ , 4b vs 12 db) (Mean  $\pm$  SEM)



## Supplemental Figure 5

**A**

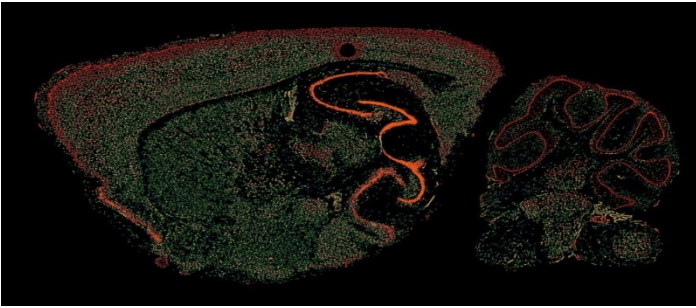

**B**

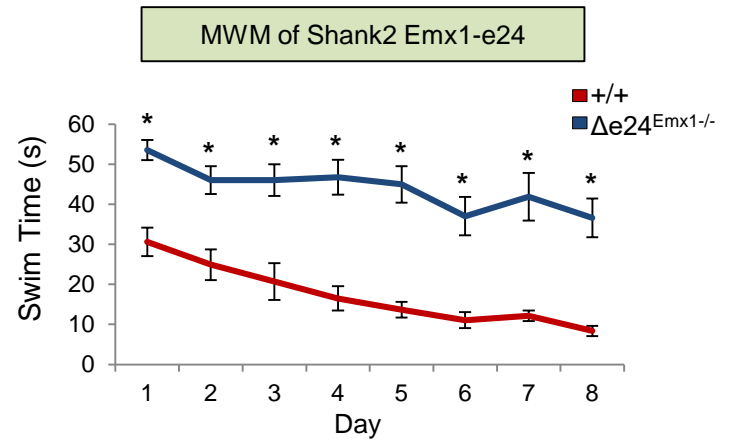

**Supplemental Figure 5.** **A.** Region specific expression of *Shank2* in mouse brain with *in situ* hybridization as displayed in the Allen Brain Atlas. **B.** The  $\Delta e24^{Emx1-/-}$  mice were deficient in spatial learning and memory. In the MWM task,  $\Delta e24^{Emx1-/-}$  mice took a significantly longer time to find the hidden platform on all 8 days of acquisition testing than the  $e24^{+/+}$  mice ( $*p < 0.05$ ,  $+/+$  vs  $-/-$ ;  $N = 13$  mice/genotype).

## Supplemental Figure 6.

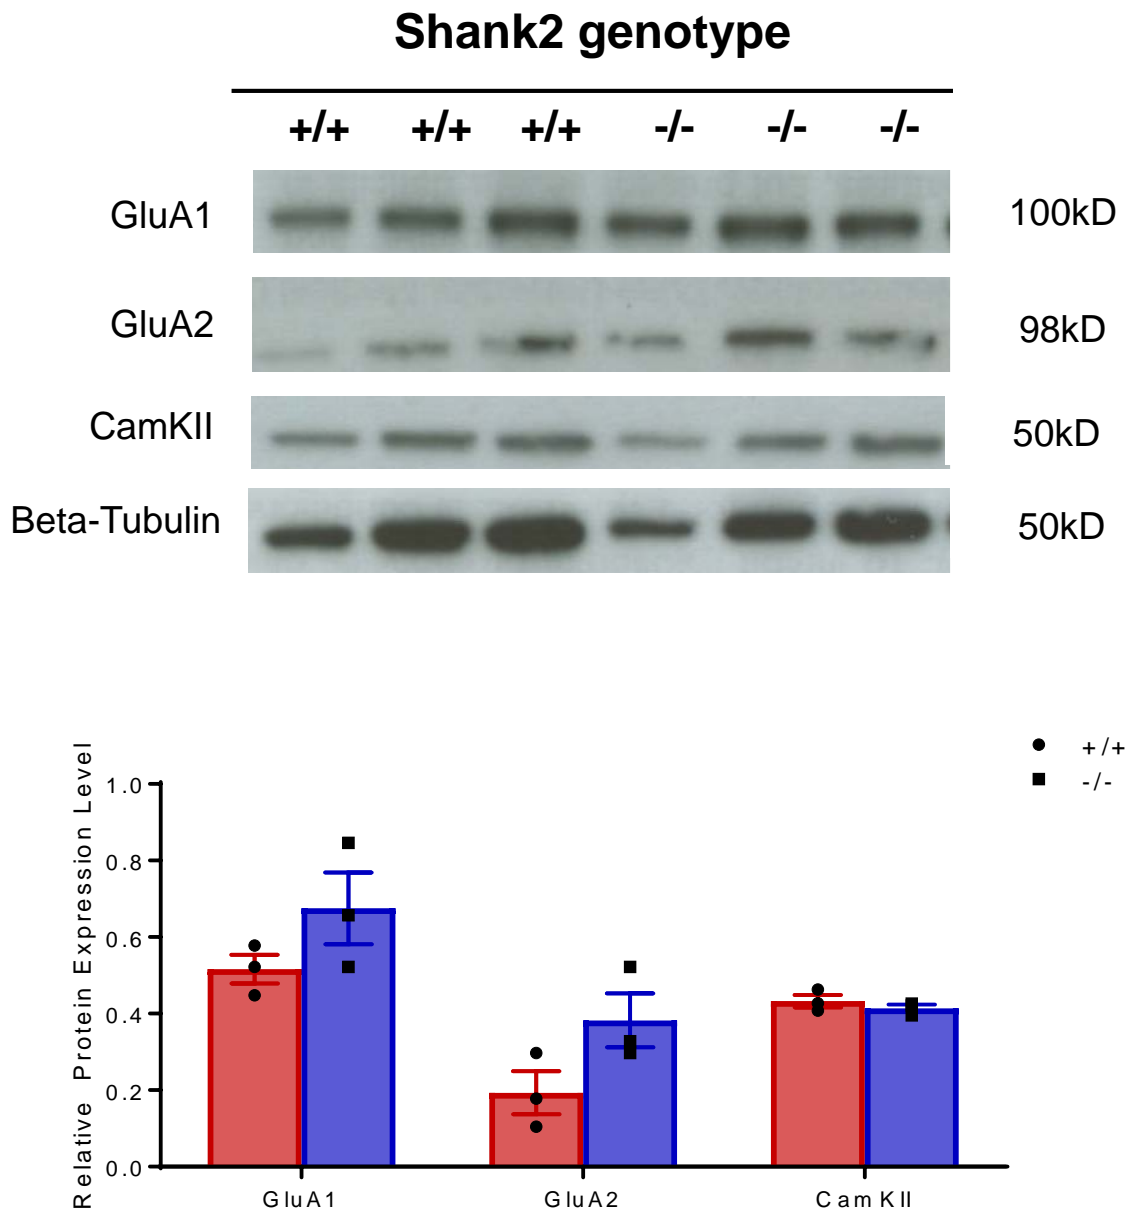

**Supplemental Figure 6.** The expression of AMPAR subunits are not significantly different in PSD of hippocampus between Shank2+/+ and Shank2-/- . A. Images of immunoblot for GluA1, GluA2, and CamKII. B. Quantification of GluA1, GluA2, and CamKII normalized to Tubulin



**Supplemental Table 1. Cohorts of Shank2  $\Delta$ e24 mutant mice used for behavioral analyses**

| Shank2 e24 (M=male and F=female) |                                                                |                                                              |                                                |                                               |                                                 |                                                |                                           |                                                                 |
|----------------------------------|----------------------------------------------------------------|--------------------------------------------------------------|------------------------------------------------|-----------------------------------------------|-------------------------------------------------|------------------------------------------------|-------------------------------------------|-----------------------------------------------------------------|
|                                  | Cohort 1                                                       | Cohort 2                                                     | Cohort 3                                       | Cohort 4                                      | Cohort 5                                        | Cohort 6                                       | Cohort 7                                  | Total/Results                                                   |
| Number of animals                | -/- F=2<br>-/- M=7<br>+/+ F=6<br>+/+ M=3<br>+/- F=5<br>+/- M=3 | -/- F=4<br>-/- M=3<br>+/+F=1<br>+/+M=6<br>+/- M=9<br>+/- F=0 | -/- F= 13<br>-/- M= 11<br>+/+ F= 11<br>+/+M= 9 | -/- F= 6<br>-/- M = 4<br>+/+ F= 9<br>+/+ M= 8 | -/- F = 10<br>-/- M = 2<br>+/+ F= 7<br>+/+ M= 5 | -/- F = 5<br>-/- M = 2<br>+/+ F= 4<br>+/+ M= 6 | -/-F=14<br>-/- M=4<br>+/+ F=13<br>+/+M=13 | -/-F=54<br>-/-M=32<br>+/+F=51<br>+/+M=50<br>+/- F=5<br>+/- M=12 |
| PPI                              |                                                                |                                                              |                                                |                                               | X                                               |                                                |                                           | No Difference                                                   |
| Elevated Zero Maze               | X                                                              |                                                              |                                                |                                               |                                                 |                                                |                                           | Altered                                                         |
| Open field                       | X                                                              | X                                                            |                                                |                                               |                                                 |                                                |                                           | Altered                                                         |
| Spray test                       | X                                                              |                                                              |                                                |                                               | X                                               |                                                |                                           | Altered                                                         |
| Hole-board                       | X                                                              | X                                                            | X                                              |                                               | X                                               |                                                |                                           | No Difference                                                   |
| Sociability                      | X                                                              |                                                              | X                                              |                                               |                                                 |                                                |                                           | Altered                                                         |
| Morris water maze                | X                                                              |                                                              |                                                |                                               |                                                 |                                                |                                           | Altered                                                         |
| Rotarod                          | X                                                              |                                                              |                                                |                                               | X                                               |                                                |                                           | Altered                                                         |
| 48 hour open field               | X                                                              | X                                                            |                                                |                                               |                                                 |                                                |                                           | Altered                                                         |
| Tail suspension                  |                                                                |                                                              | X                                              |                                               |                                                 |                                                |                                           | No Difference                                                   |
| Forced swim                      |                                                                |                                                              | X                                              | X                                             |                                                 |                                                |                                           | No Difference                                                   |
| Circadian activity               |                                                                |                                                              |                                                | X                                             |                                                 |                                                |                                           | Altered                                                         |
| Dyadic social behavior           | X                                                              | X                                                            |                                                |                                               |                                                 |                                                |                                           | Altered                                                         |
| Open field -- amphetamine        | X                                                              |                                                              |                                                |                                               | X                                               |                                                |                                           | Increased Difference                                            |
| Open field -- valproic acid      |                                                                |                                                              | X                                              |                                               |                                                 |                                                |                                           | Responded                                                       |
| Open field -- lithium            |                                                                |                                                              | X                                              |                                               |                                                 |                                                |                                           | Responded                                                       |
| Circadian activity -- lithium    |                                                                |                                                              | X                                              |                                               |                                                 |                                                |                                           | Responded                                                       |
| Lever Press                      |                                                                |                                                              |                                                |                                               |                                                 | X                                              |                                           | Altered                                                         |
| Food Consumption                 |                                                                |                                                              |                                                |                                               |                                                 | X                                              |                                           | No Difference                                                   |
| Anhedonia                        |                                                                |                                                              |                                                |                                               |                                                 |                                                | X                                         | Altered                                                         |

**Supplemental Table 2. Primers used for PCR and RT-PCR experiments**

|                                  | Primer                       | Sequence                         | Annealing Temp. |
|----------------------------------|------------------------------|----------------------------------|-----------------|
| <u>Shank2 Genotyping</u>         |                              |                                  |                 |
| WT band: 571 bp                  | X - SH2 – genomic forward    | 5' AGAAGAGAGCCTCAGTCCCTTAG 3'    | 58°             |
| FLOX band: 666 bp                | Y - SH2 – genomic reverse    | 5' GTCCTCAGAAGTGTCTGGCATG 3'     | 58°             |
| KO band: 951 bp                  | Z - SH2 – transgenic reverse | 5' TGCCCAGCGGGAGAATAAAG 3'       | 58°             |
| <u>MIB2 Genotyping</u>           |                              |                                  |                 |
| WT band: 640 bp                  | Mib2.7842:                   | 5' GCATCCAGAGCAGGCAAGTTAC 3'     | 60°             |
| KO band: 450 bp                  | Neo66:                       | 5' ATGCTCCAGACTGCCTTG 3'         | 60°             |
|                                  | Mib2.8481:                   | 5' GCATTCTGCCATCTCTGCTGGT 3'     | 60°             |
| <u>Disc Genotyping</u>           |                              |                                  |                 |
|                                  | Disc – forward               | 5' GCTGTGACCTGATGGCAGT 3'        | 58°             |
|                                  | Disc – reverse               | 5' GCAAAGTCACCTCAATAACCA 3'      | 58°             |
| <u>Cre Genotyping</u>            |                              |                                  |                 |
|                                  | Cre – forward                | 5' CAACGAGTGATGAGGTTTCGCAAG 3'   | 58°             |
|                                  | Cre – reverse                | 5' ATATTTACATTGGTCCAGCCACCAGC 3' | 58°             |
| <u>Yeast 2 Hybrid Sequencing</u> |                              |                                  |                 |
|                                  | Y2H – SP6 forward            | 5' TACGATTTAGGTGACACTATAG 3'     | 58°             |
|                                  | Y2H – M13 reverse            | 5' CAGGAAACAGCTATGACCATG         | 58°             |
| <u>RNA analysis</u>              |                              |                                  |                 |
| KO band 478 bp                   | RT-PCR Exon – 18 forward     | 5' ATGACAGCGGAGTTGGAGGAAC 3'     | 60°             |
| WT band 2.8 kb                   | RT-PCR Exon 25 – reverse     | 5' GGCAGGATCTCTTTGCTCAATTC 3'    | 60°             |
| KO band 0 bp                     | RT-PCR Exon 24 – forward     | 5' GGATTGAGGAGGTGGACAGC 3'       | 58°             |
| WT band 700 bp                   | RT-PCR Exon 25 – reverse     | 5' GGCAGGATCTCTTTGCTCAATTC 3'    | 58°             |

**Supplemental Table 3. Antibodies used in Western blot experiments**

| <b>Antibody name</b> | <b>Application</b> | <b>Dilution</b> | <b>Manufacturer</b>                       |
|----------------------|--------------------|-----------------|-------------------------------------------|
| GluA2(L21/32)        | Western blot       | 1:2000          | UC Davis/NIH NeuroMab, CA                 |
| NR2B(N59/36)         | Western blot       | 1:500           | UC Davis/NIH NeuroMab, CA                 |
| NR2A                 | Western blot       | 1:1000          | Millipore, Billerica, MA                  |
| NR1                  | Western blot       | 1:500           | Millipore, Billerica, MA                  |
| GluA1(C-terminal)    | Western blot       | 1:1000          | Abcam, Cambridge, MA                      |
| Actin                | Western blot       | 1:3000          | Santa cruz biotechnology, Santa Cruz, CA  |
| SHANK2 (H-150)       | Western blot       | 1:250           | Santa cruz biotechnology, Santa Cruz, CA. |
| NR2C                 | Western blot       | 1:500           | ABCAM, Cambridge, MA                      |
| NR2D                 | Western Blot       | 1:3000          | Millipore, Bilerica MA                    |
| CamKII               | Western blot       | 1:500           | UC Davis/NIH NeuroMab, CA                 |

**Supplemental Table 4: Comparison of Shank2 Δe24 and other Shank2 mutant mice**

|                                     | Shank2 Δe24                 | Shank2 Δe6*                      | Shank2 Δe6-7#              | Shank2 e6/floxed L7-Cre § | Shank2 e6-7/floxed Pcp2-Cre ¶                               |
|-------------------------------------|-----------------------------|----------------------------------|----------------------------|---------------------------|-------------------------------------------------------------|
| <b>Behaviors</b>                    |                             |                                  |                            |                           |                                                             |
| Locomotor activity                  |                             |                                  |                            |                           |                                                             |
| Open field 60min                    | Increased                   | Increased                        | Increased                  | NT                        | Not increased                                               |
| Open field (48 hours)               | Increased                   | NT                               | NT                         | NT                        | NT                                                          |
| Zero maze                           | Increased time in open arms | NT                               | NT                         | NT                        | NT                                                          |
| Elevated plus maze                  |                             | Decreased time in open arms      | NT                         | NT                        | NT                                                          |
| Hole board                          | Normal                      | NT                               | NT                         | NT                        | Abnormal                                                    |
| Grooming                            | Normal                      | Increased                        | Normal                     | NT                        | Normal                                                      |
| MWM: acquisition reversal           | Impaired<br>Impaired        | Impaired<br>NT                   | NT<br>NT                   | NT<br>NT                  | NT<br>NT                                                    |
| Social Affiliation (3 chamber test) | Impaired in female          | Impaired                         | Impaired                   | Impaired                  | Normal                                                      |
| Social dyadic                       | Impaired                    | NT                               | NT                         | NT                        | NT                                                          |
| Rotarod                             | Impaired                    | Normal                           | NT                         | NT                        | NT                                                          |
| Running wheel                       | Abnormal                    | NT                               | NT                         | NT                        | NT                                                          |
| Lever press                         | Increased food rewarding    | NT                               | NT                         | NT                        | NT                                                          |
| USV                                 | NT                          | Abnormal                         | Abnormal                   | NT                        | Normal                                                      |
| Light dark                          | NT                          | Abnormal                         | Normal                     | NT                        | Abnormal                                                    |
| Novel objective recognition         | NT                          | Normal                           | Normal                     | NT                        | NT                                                          |
| <b>Synaptic Protein</b>             |                             |                                  |                            |                           |                                                             |
|                                     | Hippocampus                 | Hippocampus                      | Whole brain                | Cerebellum                | Cerebellum                                                  |
| NR1                                 | Reduced                     | Normal                           | Reduced                    | NT                        | Normal                                                      |
| NR2A                                | Reduced                     | Increased                        | Reduced                    | NT                        | Normal                                                      |
| NR2B                                | Increased                   | Increased                        | Reduced                    | NT                        | Normal                                                      |
| <b>Synaptic function</b>            |                             |                                  |                            |                           |                                                             |
| NMDAR function in CA1               | Reduced NMDR Current        | Enhanced NMDA/AMPA ratio current | Reduced NMDA/AMPA ratio    | Increased sIPSC           | Reduced mEPSC, increased AMPA ePSC, reduced NMDA/AMPA ratio |
| Synaptic plasticity in CA1          | NT                          | Enhanced LTP                     | Reduced LTP<br>Reduced LTD | Reduced LTP               | NT                                                          |

\* Schmeisser., et al. (2012). Autistic-like behaviours and hyperactivity in mice lacking ProSAP1/Shank2. Nature 486, 256-260.

#Won, et al. (2012). Autistic-like social behaviour in Shank2-mutant mice improved by restoring NMDA receptor function. Nature 486, 261-265

§, Ha, S., Lee, D., Cho, Y.S., Chung, C., Yoo, Y.E., Kim, J., Lee, J., Kim, W., Kim, H., Bae, Y.C., et al. (2016). Cerebellar Shank2 Regulates Excitatory Synapse Density, Motor Coordination, and Specific Repetitive and Anxiety-Like Behaviors. J. Neurosci. 36, 12129-12143

¶, Peter, S., Ten Brinke, M.M., Stedehouder, J., Reinelt, C.M., Wu, B., Zhou, H., Zhou, K., Boele, H.J., Kushner, S.A., Lee, M.G., et al. (2016). Dysfunctional cerebellar Purkinje cells contribute to autism-like behaviour in Shank2-deficient mice. Nature communications 7, 12627

NT, not tested

## **Supplemental Methods**

### **Open field activity and amphetamine induced hyperlocomotion**

Spontaneous activity in the open field was conducted over 1 hour or over 48 hours in an automated Versamax Legacy open field apparatus for mice (Omnitech Electronics Incorporated, Columbus, OH). Distance traveled, vertical activity (beam-breaks), and center time were measured by infrared photobeams located around the perimeter of the arenas (see (1) and interfaced to a computer running Fusion 5.3 for Versamax software (Omnitech Electronics Incorporated) which monitored the location and activity of the mouse during testing . Activity plots were generated using the Fusion Locomotor Activity Plotter analyses module (Omnitech Electronics Incorporated). To determine whether amphetamine would modify locomotion, mice were placed into the open field for 60 min to assess baseline activity. Mice were removed from the open field, injected with 2 mg/kg amphetamine (i.p.), and immediately returned to the open field for 120 min. For all tests, mice were transferred to the testing room 18-24 hr prior to testing.

### **Rotarod performance**

Rotarod performance was assessed using a steady-speed (24 rpm) protocol. Animals were tested on a Med-Associates (St. Albans, VT) rotarod for mice, based on methods previously described (2, 3). Mice were given 4 successive 5-min trials which were separated by 30 min intervals. Trials were terminated when the mouse fell from the rod or at 300 s.

### **Anhedonia**

Mice were examined for anhedonia-like behavior based Fukui and colleagues(4). Mice were housed individually for the duration of testing with two bottles. For the first two days, both

bottles were filled with tap water. On day 3 the water bottles were replaced with one bottle filled with water and the other with 2% sucrose solution (Superfine Quick Dissolve Cane Sugar; Domino Foods Inc., Yonkers, NY). After 24 hr the positions of the bottles counterbalanced to preclude positional bias. At the beginning and end of each 24 hour period, the bottles were weighed and total volumes of water and/or sucrose consumed were noted. A preference score was calculated as the total volume of sucrose consumed minus the total volume of water consumed, divided by the total volume of both sucrose and water consumed. Positive preference scores indicated a preference for the sucrose solution across the two test days; scores approaching "0" (indicated no preference) were operationally defined as "anhedonic-like" responses.

### **Tail suspension**

Mice were suspended by their tails in a Med Associates tail suspension apparatus (St. Albans, VT) for 6 min as described previously (4). Immobility time was scored automatically by a computer interfaced to the apparatus and running Tail Suspension software (MedAssociates).

### **Forced swim**

In forced swim, mice were placed into a 4L beaker (18 cm diameter x 25 cm tall) of water held at 25°C with the water depth at 15 cm for 6 min (4). Behavior was recorded from a side-view and saved to digital video (Noldus Media Player; Noldus Information Technologies, Leesburg, VA) and scored subsequently for immobility with Ethovision 11.5 (Noldus Information Technologies). Immobility time was scored automatically by software calibrated by trained observers to equal the time that the animal spent floating or engaged in minimal activity for at least 1 sec.

### **Circadian activity and lithium treatment**

Mice were individually housed in cages (32 x 14 x 12 cm) equipped with 10 cm diameter x 5 cm wide-track width running wheels (Coulburn Instruments, Whitehall, PA). The cages were housed in a Phenome Technologies (Lincolnshire, IL) ventilated cabinet for mice, equipped with 526 nm green wave-length LED for illumination during the light cycle, and infrared LED for the dark cycle. Water and rodent chow (Lab Diet 5001; Lab Diet, St. Louis, MO) were provided throughout the course of the study. Activity data were collected using the ClockLab software (Actimetrics, Wilmette, IL). Mice were placed on a 12:12 hr light:dark (LD) cycle (light onset 0800 hr) for 10 days. Following the entrainment of mice to the 12:12 hr LD cycle, they were placed into constant darkness (DD) for 32 days. On day 42, the mice were subjected to a 6 hr light pulse at CT 16 (circadian hr 16 within a projected 24 hr cycle, based on the individual “tau” for each animal) and returned to DD for another 20 days. On day 62, the animals were placed back on a 12:12 hr LD cycle for 14 days for a final entrainment. Actigrams were generated with Actimetrics Clock software and the data were exported to SPSS (IBM, Armonk, NY) for subsequent statistical analyses. Tau ( $\tau$ ), activity and the average wheel running counts (revolutions per minute for each hr in a single circadian day) were estimated for individual mouse using data from 7 consecutive days before the completion of each phase of testing (5) for entrainment (days 3-10), the free running period (days 36-42), and the final re-entrainment period (days 56-62).

For lithium treatment, mice were fed lithium carbonate chow prepared by Harlan Teklad (Madison, WI). The lithium diet was prepared in a base diet of 5001 for comparison to the untreated control mice. Lithium treatment was initiated with 0.2% lithium carbonate chow. After 2 weeks, mice were placed on 0.4% lithium chow for 4 weeks and then placed into the running wheel cages, using the same protocol as for the untreated mice. The lithium-treated mice remained on the 0.4% chow for the duration of the study. As a precaution to offset the possibility of hyponatremia induced by long-term consumption of the lithium, the drinking water for these animals was supplemented with 450 nM NaCl as described (6).

### **Effects of valproic acid (VPA) and lithium on locomotor activity**

To assess the effects of valproic acid on locomotor activity, mice were injected with valproate (400 mg/kg) or saline (5 ml/kg, i.p.) 30 min before being placed into the open field. To examine the effects of chronic lithium treatment on open field activity, mice were fed a control diet of 5001 rodent chow or 0.4% lithium carbonate diet for 4 weeks prior to testing.

### **Sociability testing**

Mice were examined for sociability as described (84) Sociability was operationally defined as a preference to interact with a social stimulus over a non-social stimulus. One week prior to testing, C3H female mice (Jackson Labs) were handled and trained to sit inside the wire-mesh cages. These animals served as the social stimuli during testing. There were two test phases: exploration of two identical non-social stimuli, and the pairing of a social stimulus (C3H mouse) with a non-social stimulus. Test phase 1 began when a Shank2 mouse was placed into the center chamber and was given free access to the entire apparatus with two wire mesh cages, each containing identical inanimate objects. After 10 min the Shank2 mouse was removed and one of the wire-mesh cages was replaced with an identical cage containing a novel C3H partner. Test phase 2 (social affiliation) began immediately with reintroduction of the target mouse into the center chamber. After 10 min, all animals were removed and the test arena, cages, and objects thoroughly cleaned with LabSan. All tests were filmed and analyzed using Ethovision 9 (Noldus Information Technologies) for the duration of contacts with each cage. Preference scores were calculated, where time spent with one stimulus (non-social stimulus 1 or the social stimulus 1) was subtracted from the time spent with the the 2nd non-social stimulus, and divided by the total time spent exploring both stimuli. Positive scores indicated preference the novel social stimulus, whereas negative scores denoted preference for the non-social relative to the social stimulus. Scores approaching zero indicated no preference.



### **Water-spray induced grooming**

Mice were placed into a clean mouse cage for 5 min and baseline grooming behavior was scored. After 5 min, mice were lightly misted with tap water and grooming was scored for 5 additional min. Behavior was recorded with Media Recorder 2 (Noldus Information Technologies) and the videos were scored for grooming behavior with automated behavioral recognition TopScan software (CleverSys, Reston, VA), which scored the number of grooming bouts and the duration of grooming for each 5-min interval before and after water misting. .

### **Hole-board test**

Animals were examined in a hole-board test for 5 min as described (7). Mice were placed individually into a 42 x 42 x 30 cm arena with a hole-board containing 16 equally spaced holes (3 cm in diameter) arranged in 4 rows. Behaviors were filmed with Media Player 2 (Noldus Information Technologies) and scored with the Observer XT 10 program (Noldus Information Technologies) by trained observers blinded to the genotype and sex of the animals. The number of head-pokes and the frequency of holes used were scored for each animal. Data were reported as the total holes visited, percent of holes used of the 16 holes available, and the frequency of head-pokes for the number of holes used by each mouse.

### **Morris water maze**

Spatial learning and memory, and plasticity were examined in the Morris water maze (MWM) as described in the mouse (2, 3, 7). Before testing, mice were handled and acclimated to standing in water for the week prior to testing. Two days before the start of testing, mice were tail-marked and moved to the test room. On the day before testing, mice were placed on the hidden platform in the NE quadrant and then allowed to swim freely for 15-20 sec before being returned to the platform for 5 sec for one trial. The next day, water-maze testing began and was divided

into 2 phases: acquisition (days 1 to 8) with the hidden platform in the NE quadrant and reversal (days 9 to 16) with the platform in the SW quadrant. Each day the mice received two sets of paired trials that were separated by 60 min, for a total of 4 trials per day. Release points were randomized across trials and days. On days 2, 4, 6, 8, 10, 12, 14, and 16, a single probe trial was given 1 hr after the 4 test trials. On probe trials, the platform was removed and the mice were released from the southern-most point on days 2, 4, 6 and 8, and from the northern-most point on days 10, 12, 14 and 16. In addition to acquisition and reversal training, a separate cohort of naïve mice was tested in the visible platform task over 3 consecutive days at 4 trials a day. Here, the mice were released from the northern-most point and given 60 sec to swim to the visible platform. Performance on all tests was scored by Ethovision XT 9 (Noldus Information Technologies) using a high-resolution camera suspended 1.8 m above the center of the pool. Except for probe trials that were preset for 60 sec, all trials ended when the animal located the platform or after 60 sec of swimming.

## Reference:

1. Pogorelov VM, Rodriguiz RM, Insko ML, Caron MG, and Wetsel WC. Novelty Seeking and Stereotypic Activation of Behavior in Mice with Disruption of the *Dat1* Gene. *Neuropsychopharmacology*. 2005;30(10):1818-31.
2. Wang X, McCoy PA, Rodriguiz RM, Pan Y, Je HS, Roberts AC, Kim CJ, Berrios J, Colvin JS, Bousquet-Moore D, et al. Synaptic dysfunction and abnormal behaviors in mice lacking major isoforms of *Shank3*. *Hum Mol Genet*. 2011;20(15):3093-108.
3. Taylor GA, Rodriguiz RM, Greene RI, Daniell X, Henry SC, Crooks KR, Kotloski R, Tessarollo L, Phillips LE, and Wetsel WC. Behavioral characterization of P311 knockout mice. *Genes, brain, and behavior*. 2008;7(7):786-95.
4. Fukui M, Rodriguiz RM, Zhou J, Jiang SX, Phillips LE, Caron MG, and Wetsel WC. *Vmat2* heterozygous mutant mice display a depressive-like phenotype. *J Neurosci*. 2007;27(39):10520-9.
5. Jud C, Schmutz I, Hampp G, Oster H, and Albrecht U. A guideline for analyzing circadian wheel-running behavior in rodents under different lighting conditions. *Biol Proced Online*. 2005;7(101-16).

6. O'Brien WT, Harper AD, Jové F, Woodgett JR, Maretto S, Piccolo S, and Klein PS. Glycogen Synthase Kinase-3 $\beta$  Haploinsufficiency Mimics the Behavioral and Molecular Effects of Lithium. *The Journal of Neuroscience*. 2004;24(30):6791-8.
7. Porton B, Rodriguiz RM, Phillips LE, Gilbert JW, Feng J, Greengard P, Kao H-T, and Wetsel WC. Mice lacking synapsin III show abnormalities in explicit memory and conditioned fear. *Genes, brain, and behavior*. 2010;9(3):257-68.
